# Supplementary material
Source: Springer Nature journal article supplement (https://www.springermedizin.de/resource/supplementary/12985_2011_1544_MOESM10_ESM.pdf/9610044)

Ank3 Tyr181  
Ank5 Tyr248

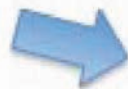

Ank3 His184  
Ank5 Tyr251

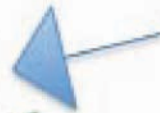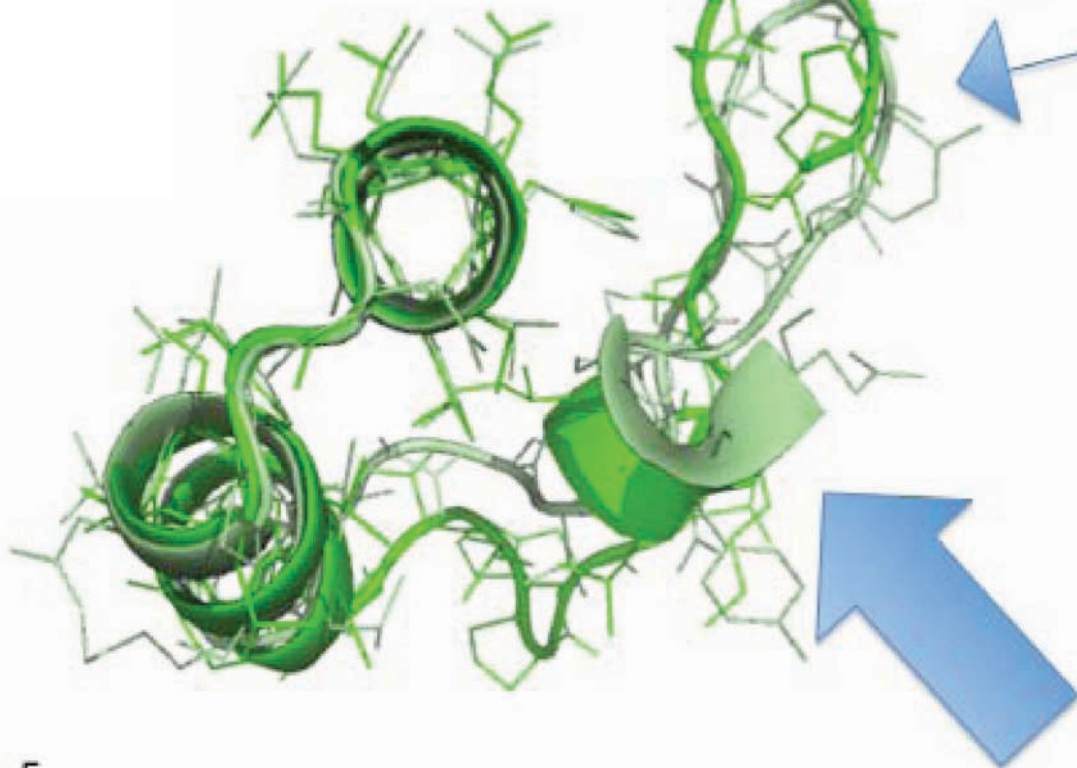

Ank3, 5  
Helices Aligned

Ank3/5 structure

Supplement: MOESM10 [file 9610044]
